# Supplementary material for: Poly[(N-acryloyl glycine)-co-(acrylamide)]-induced cell growth inhibition in heparanase-driven malignancies
Source: Royal Society of Chemistry journal article supplement (doi:10.1039/d5nr00079c), 2025-01-01
Supplement: d5nr00079c1.pdf [file d5nr00079c1.pdf]

**Supporting Document**

**Poly[(N-acryloyl glycine)-co-(acrylamide)] induced cell growth inhibition in heparanase driven malignancies**

Kirti Wasnik<sup>a†</sup>, Gurmeet Singh<sup>a</sup>, Desh Deepak Yadav<sup>a</sup>, Sukanya Patra<sup>a</sup>, Prem S. Gupta<sup>a</sup>, Alagu Oviya<sup>a</sup>, Sandeep Kumar,<sup>b</sup> Divya Pareek<sup>a</sup>, Pradip Paik<sup>a\*</sup>

---

<sup>a.</sup> *School of Biomedical Engineering, Indian Institute of Technology, Banaras Hindu University (BHU), Varanasi, Uttar Pradesh, 221 005, India.*

<sup>b.</sup> *Department of Zoology, Banaras Hindu University (BHU), Varanasi, Uttar Pradesh 221005, India.*

---

*Corresponding Author's email: \*E-mail: paik.bme@iitbhu.ac.in*

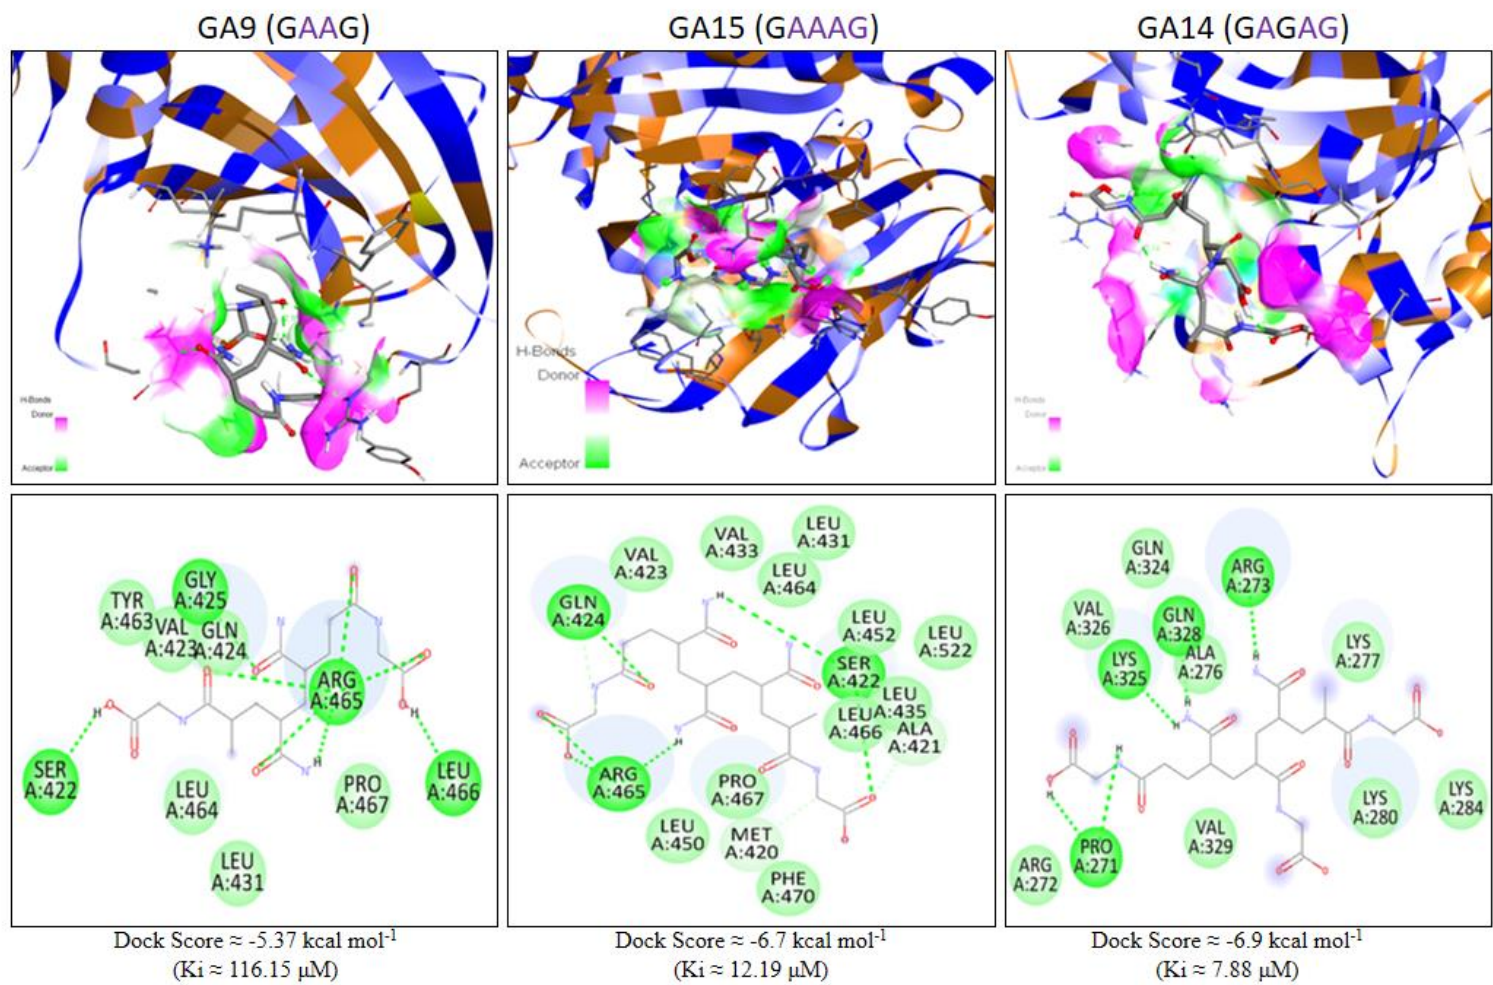

Figure S1 : Docking poses for complex of GA9, GA15 and GA14

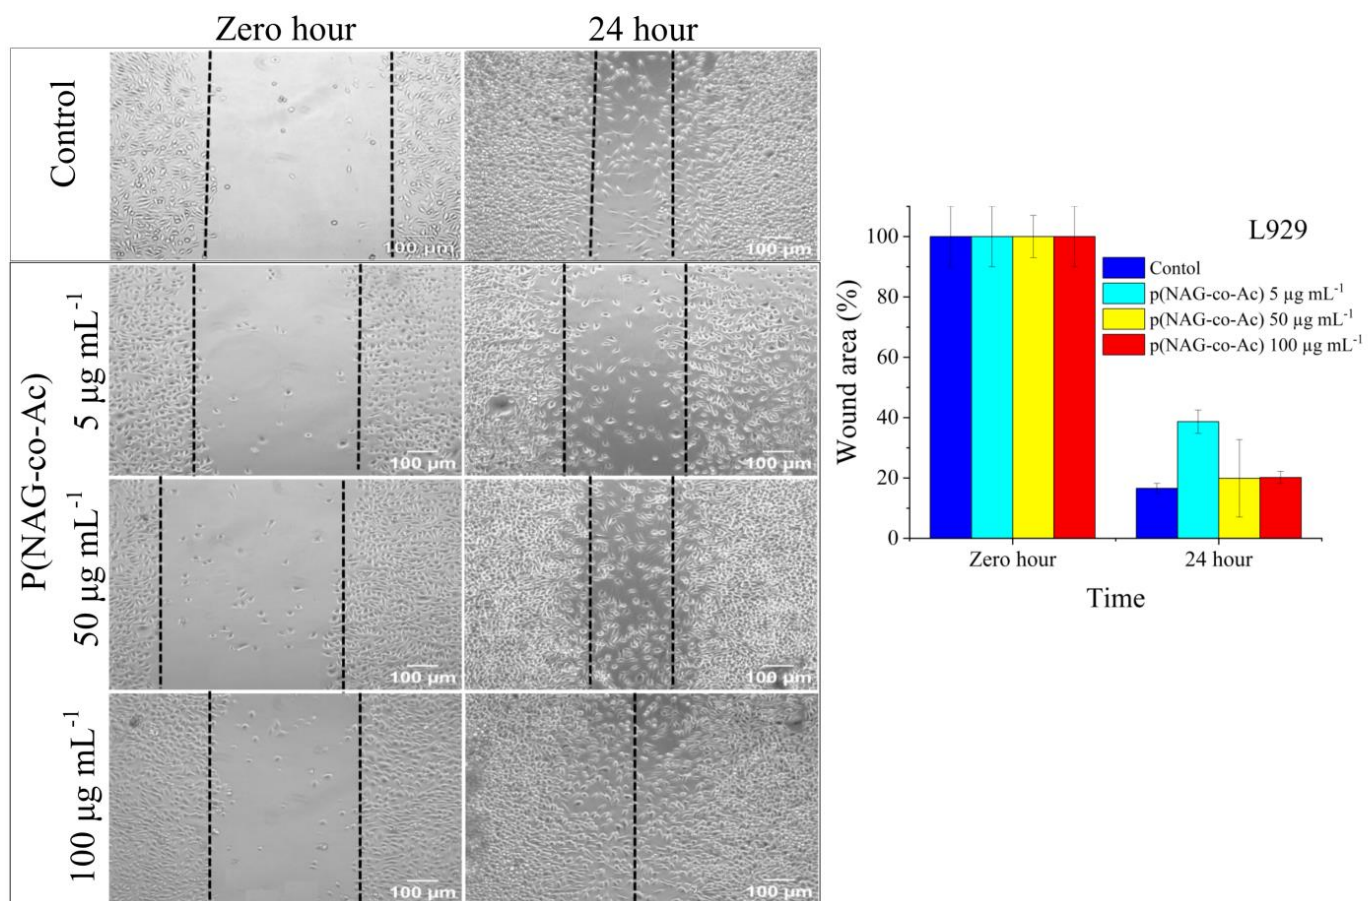

Figure S2: Wound sketch assay on L929 cell line after treatment with p(Nag-co-Ac) hydrogel

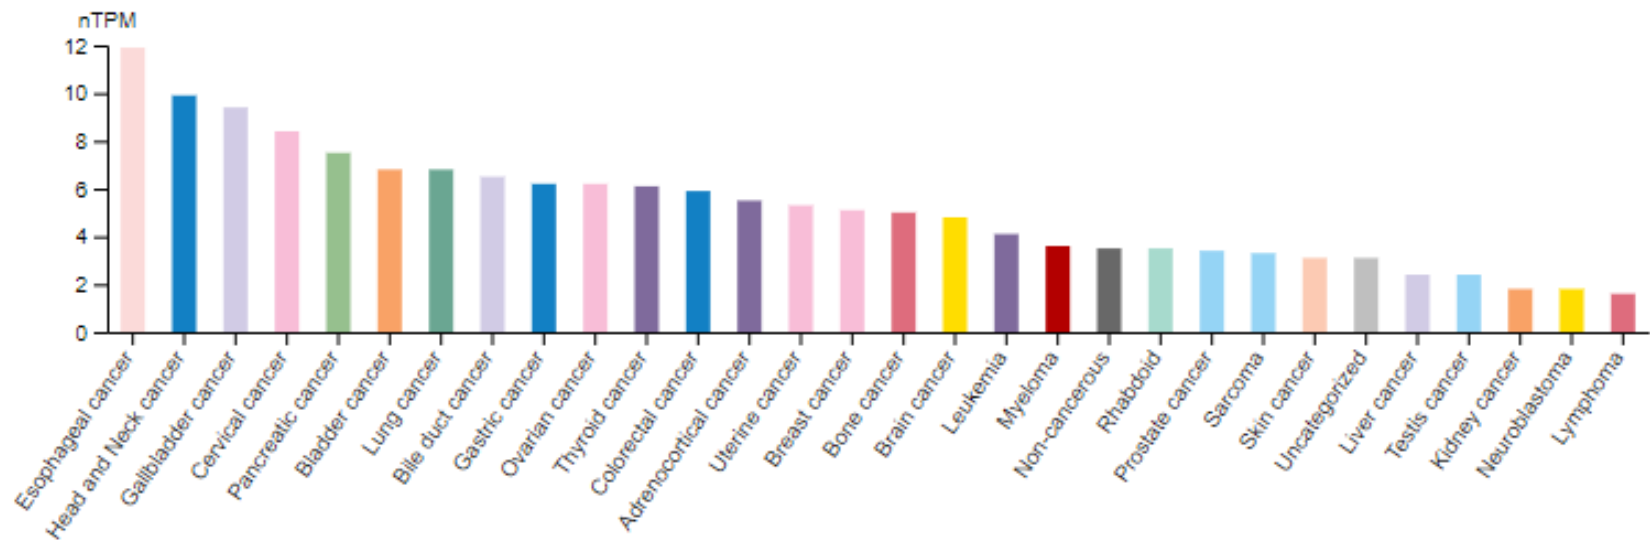

Figure S3: Heparanase gene expression in cancer obtained from Human Protein Atlas

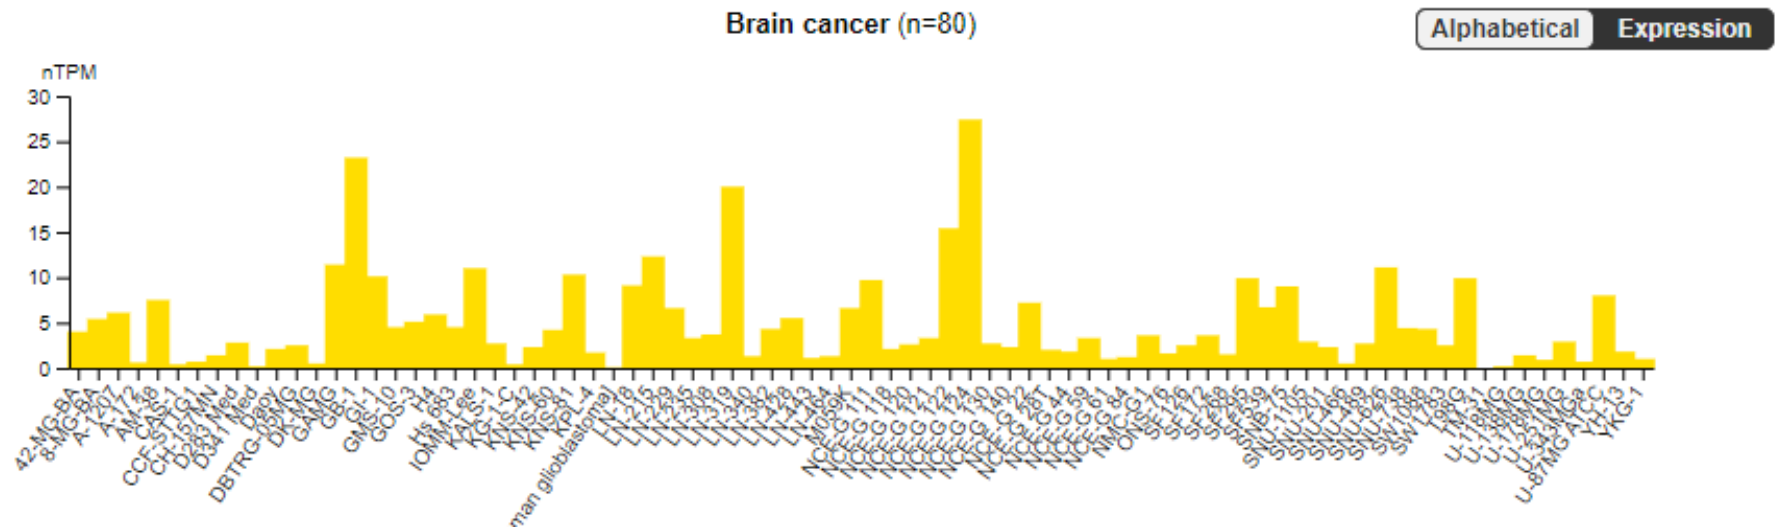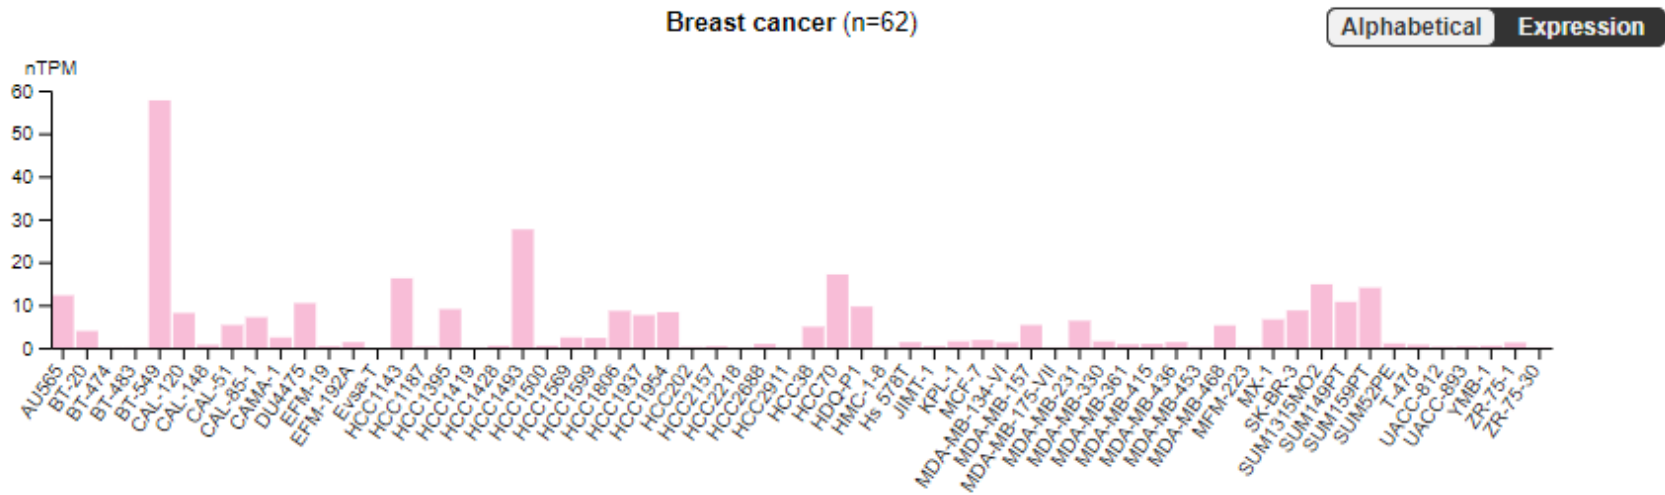

Figure S4. Heparanase gene expression in brain cancer and in breast cancer obtained from Human Protein Atlas

Table S1: Bioactivity score of (a) homopolymer of n-acryloyl glycine (b) Linear hetro- polymer of n-acryloyl glycine and acrylamide and (c) cross-linked homopolymer and (d) cross-linked hetropolymer represent p(NAG-co-Ac) polymer.

| Sr.No | p(NAG-co-Ac) random series | Protease inhibitor | GPCR ligand | Ion channel modulator | Kinase inhibitor | Nuclear receptor ligand | Enzyme inhibitor |
|-------|----------------------------|--------------------|-------------|-----------------------|------------------|-------------------------|------------------|
| 1     | G1                         | -1.97              | -2.23       | -1.72                 | -2.82            | -2.34                   | -1.62            |
| 2     | G2                         | 0.26               | -0.06       | -0.1                  | -0.74            | -0.36                   | 0.06             |
| 3     | G3                         | 0.41               | 0.1         | -0.1                  | -0.39            | -0.1                    | 0.39             |
| 4     | G4                         | 0.29               | 0.07        | -11                   | -0.29            | -0.07                   | 0.04             |
| 5     | G5                         | 0.17               | -0.14       | -0.76                 | -0.63            | -0.48                   | -0.36            |
| 6     | G6                         | -0.61              | -1.17       | -2.29                 | -1.97            | -1.91                   | -1.6             |
| 7     | G7                         | -2.21              | -2.94       | -3.58                 | -3.55            | -3.53                   | -3.26            |
| 8     | G8                         | -3.52              | -3.66       | -3.78                 | -3.79            | -3.77                   | -3.52            |
| 9     | G9                         | -3.78              | -3.9        | -3.94                 | -3.96            | -3.85                   | -3.91            |
| 10    | G10                        | -3.85              | -3.96       | -3.99                 | -4               | -4                      | -3.97            |
| 11    | G11                        | -3.92              | -3.83       | -3.83                 | -3.66            | -3.87                   | -3.67            |
| 12    | A1                         | -3.74              | -3.83       | -3.83                 | -3.66            | -3.87                   | -3.67            |
| 13    | A2                         | -0.64              | -1.02       | -0.71                 | -1.48            | -1.46                   | -0.65            |
| 14    | A3                         | -0.12              | -0.4        | -0.34                 | -0.74            | -0.68                   | -0.22            |
| 15    | GA1                        | 0.16               | -0.45       | -0.33                 | -1.19            | -0.97                   | -0.15            |
| 16    | GA4.1                      | 0.38               | 0.02        | -0.17                 | -0.57            | -0.27                   | 0.09             |
| 17    | GA2                        | 0.54               | 0.14        | -0.11                 | -0.33            | -0.07                   | 0.1              |
| 18    | GA3                        | 0.5                | 0.13        | -0.15                 | -0.41            | -0.14                   | 0.08             |
| 19    | GA4                        | 0.5                | 0.13        | -0.15                 | -0.41            | -0.14                   | 0.08             |
| 20    | GA5                        | 0.41               | 0.1         | -0.08                 | -0.24            | -0.04                   | 0.07             |

|    |      |       |       |       |       |       |       |
|----|------|-------|-------|-------|-------|-------|-------|
| 21 | GA6  | 0.38  | 0.1   | -0.11 | -0.29 | -0.1  | 0.06  |
| 22 | GA7  | 0.45  | 0.11  | -0.13 | -0.27 | -0.05 | 0.07  |
| 23 | GA8  | 0.45  | 0.11  | -0.13 | -0.27 | -0.05 | 0.07  |
| 24 | GA9  | 0.44  | 0.11  | -0.13 | -0.33 | -0.11 | 0.07  |
| 25 | GA10 | 0.32  | 0.06  | -0.36 | -0.28 | -0.15 | -0.06 |
| 26 | GA11 | 0.3   | 0.06  | -0.38 | -0.33 | -0.19 | -0.07 |
| 27 | GA12 | 0.3   | 0.06  | -0.38 | -0.33 | -0.19 | -0.07 |
| 28 | GA13 | 0.33  | 0.09  | -0.16 | -0.25 | -0.09 | 0.05  |
| 29 | GA14 | 0.33  | 0.09  | -0.16 | -0.25 | -0.09 | 0.05  |
| 30 | GA15 | 0.37  | 0.1   | -0.11 | -0.28 | -0.09 | 0.06  |
| 31 | GA16 | 0.44  | 0.1   | -0.13 | -0.27 | -0.05 | 0.06  |
| 32 | GA17 | 0.32  | 0.08  | -0.2  | -0.25 | -0.09 | 0.04  |
| 33 | D1   | 0.28  | 0.06  | 0.05  | -0.58 | -0.03 | 0.2   |
| 34 | D2   | 0.42  | 0.18  | -0.03 | -0.28 | 0.04  | 0.13  |
| 35 | D3   | 0.32  | 0.14  | 0.01  | -0.31 | -0.06 | 0.1   |
| 36 | D4   | 0.17  | 0     | -0.39 | -0.38 | -0.23 | -0.14 |
| 37 | D5   | -0.24 | -0.62 | -1.5  | -1.31 | -1.22 | -1    |
| 38 | D6   | -1.28 | -1.93 | -3.07 | -2.89 | -2.85 | -1.28 |
| 39 | D7   | -2.83 | -3.37 | -3.66 | -3.67 | -3.65 | -3.55 |
| 40 | D8   | -3.59 | -3.71 | -3.81 | -3.82 | -3.81 | -3.75 |
| 41 | D9   | -3.76 | -3.83 | -3.89 | -3.9  | -3.9  | -3.85 |
| 42 | D10  | -3.85 | -3.9  | -3.95 | -3.96 | -3.96 | -3.92 |
| 43 | D11  | -3.81 | -3.87 | -3.92 | -3.93 | -3.93 | -3.88 |
| 44 | D12  | -3.75 | -3.83 | -3.89 | -3.9  | -3.9  | -3.85 |
| 45 | D13  | -3.68 | -3.77 | -3.86 | -3.86 | -3.87 | -3.81 |
| 46 | D14  | -3.58 | -3.7  | -3.81 | -3.81 | -3.82 | -3.75 |
| 47 | D15  | -2.79 | -3.37 | -3.67 | -3.66 | -3.67 | -3.55 |
| 48 | D16  | -1.96 | -2.77 | -3.56 | -3.51 | -3.51 | -3.16 |
| 49 | D17  | -1.19 | -1.91 | -3.14 | -2.88 | -2.9  | -2.45 |
| 50 | D18  | -0.11 | -0.59 | -1.54 | -1.22 | -1.23 | -0.94 |

|    |     |      |       |       |       |       |       |
|----|-----|------|-------|-------|-------|-------|-------|
| 51 | D19 | 0.35 | 0.04  | -0.46 | -0.38 | -0.27 | -0.12 |
| 52 | D20 | 0.2  | -0.18 | -0.9  | -0.72 | -0.64 | -0.44 |
| 53 | D21 | 0.45 | 0.15  | -0.16 | -0.27 | -0.07 | 0.05  |
| 54 | D22 | 0.5  | 0.17  | -0.06 | -0.29 | -0.07 | 0.07  |
| 55 | D23 | 0.44 | 0.13  | -0.06 | -0.33 | -0.12 | 0.01  |
| 56 | D24 | 0.45 | 0.19  | -0.09 | -0.43 | -0.09 | 0.08  |
| 57 | D25 | 0.41 | 0.17  | -0.07 | -0.32 | -0.18 | 0.07  |
| 58 | D26 | 0.26 | 0.07  | -0.16 | -0.25 | -0.09 | 0.01  |



Table S2: DFT calculation for (a) homopolymer of *n*-acryloyl glycine (b) Linear hetro- polymer of *n*-acryloyl glycine and acrylamide and (c) cross-linked homopolymer and (d) cross-linked hetropolymer represent *p*(NAG-co-Ac) polymer, changes in dipole moment and Intramolecular hydrogen bonding in different solvent

|   |    |                                  | molecu<br>lar<br>weight<br>(g/<br>mol) | hERG<br>beta<br>(ADM<br>ET) | Free<br>energy<br>in<br>Vaccu<br>me<br>(Fc)(E<br>h) | Dipol<br>e<br>mom<br>ent in<br>gas<br>( $\mu'$ c)<br>(Deb<br>ye) | Free<br>energy<br>in gas<br>(Fw)(E<br>h) | Dipol<br>e<br>mom<br>ent in<br>gas<br>( $\mu'$ w)<br>(Deb<br>ye) | Free<br>energy<br>in<br>ethanol<br>(Fe)(E<br>h) | Dipol<br>e<br>mom<br>ent in<br>ethan<br>ol<br>( $\mu'$ e)<br>(Deb<br>ye) | Intramolc<br>ular<br>hydrogen<br>bonding<br>in water<br>(Kcal<br>/mol) | Intermolec<br>ular<br>hydrogen<br>bonding<br>energy in<br>ethanol<br>(Kcal<br>/mol) | Intramolc<br>ular<br>hydrogen<br>bonding<br>in<br>hexane(K<br>cal /mol) | Intramol<br>cular<br>hydroge<br>n<br>bonding<br>in<br>chcl3(K<br>cal<br>/mol) |
|---|----|----------------------------------|----------------------------------------|-----------------------------|-----------------------------------------------------|------------------------------------------------------------------|------------------------------------------|------------------------------------------------------------------|-------------------------------------------------|--------------------------------------------------------------------------|------------------------------------------------------------------------|-------------------------------------------------------------------------------------|-------------------------------------------------------------------------|-------------------------------------------------------------------------------|
| 1 |    | Glycine                          |                                        |                             | -<br>284.07<br>3                                    | 5.59                                                             | -<br>284.09<br>1                         | 7.27                                                             | -<br>284.09<br>0                                | 7.21                                                                     | -11.25                                                                 | -10.84                                                                              |                                                                         |                                                                               |
| 2 | G1 | N-<br>Acryloyl<br>glycine<br>(G) |                                        |                             | -<br>475.02<br>9                                    | 1.93                                                             | -<br>475.05<br>3                         | 1.95                                                             | -<br>475.05<br>2                                | 1.95                                                                     | -14.98                                                                 | -14.45                                                                              |                                                                         |                                                                               |
| 3 | G2 | GG                               |                                        |                             | -<br>951.31<br>9                                    | 3.00                                                             | -<br>951.36<br>6                         | 3.34                                                             | -<br>951.36<br>5                                | 3.33                                                                     | -29.84                                                                 | -28.80                                                                              |                                                                         |                                                                               |
| 4 | G3 | GGG                              |                                        |                             | -<br>1424.9<br>91                                   | 2.95                                                             | -<br>1425.0<br>57                        | 6.68                                                             | -<br>1425.0<br>55                               | 6.51                                                                     | -41.58                                                                 | -40.10                                                                              |                                                                         |                                                                               |
| 5 | G4 | GGGG                             |                                        |                             | -<br>1899.6<br>44                                   | 5.45                                                             | -<br>1899.7<br>11                        | 8.67                                                             | -<br>1899.7<br>08                               | 8.50                                                                     | -41.81                                                                 | -40.23                                                                              |                                                                         |                                                                               |
| 6 | G5 | GGGGG                            |                                        |                             | -<br>2374.2<br>51                                   | 7.74                                                             | -<br>2374.3<br>32                        | 13.92                                                            |                                                 |                                                                          | -50.42                                                                 |                                                                                     |                                                                         |                                                                               |
| 7 | G6 | GGGGG<br>G                       |                                        |                             | -<br>2848.8<br>80                                   | 3.83                                                             | -<br>2848.9<br>62                        | 4.77                                                             | -<br>2848.9<br>59                               | 4.82                                                                     | -51.69                                                                 | -49.79                                                                              |                                                                         |                                                                               |

|        |           |       |        |                |                   |       |                   |       |                   |       |        |        |  |  |
|--------|-----------|-------|--------|----------------|-------------------|-------|-------------------|-------|-------------------|-------|--------|--------|--|--|
| 8      | GA1       | GA    | 202.21 | 3.78(sa<br>fe) | -<br>722.79<br>5  | 4.53  | -<br>722.83<br>0  | 5.47  | -<br>722.82<br>9  | 5.44  | -21.98 | -21.21 |  |  |
| 1<br>0 | GA4<br>.1 | AAG   | 273.29 | 3.88(sa<br>fe) | -<br>969.82<br>2  | 5.50  | -<br>969.86<br>4  | 7.55  | -<br>969.86<br>3  | 7.46  | -26.79 | -25.84 |  |  |
| 1<br>1 | GA2       | GGA   | 331.33 | 4.24(sa<br>fe) | -<br>1197.4<br>32 | 3.85  | -<br>1197.4<br>79 | 11.04 | -<br>1197.4<br>77 | 10.86 | -29.59 | -28.47 |  |  |
| 1<br>2 | GA3       | AGG   | 331.33 | 4.25(sa<br>fe) | -<br>1197.4<br>31 | 8.49  | -<br>1197.4<br>87 | 8.66  | -<br>1197.4<br>86 | 8.59  | -35.10 | -34.25 |  |  |
| 1<br>3 | GA4       | GAG   | 331.33 | 4.25(sa<br>fe) | -<br>1197.4<br>10 | 4.77  | -<br>1197.4<br>57 | 7.12  | -<br>1197.4<br>56 | 6.99  | -30.02 | -28.92 |  |  |
| 1<br>4 | GA5       | GGGA  |        |                | -<br>1672.0<br>50 | 5.32  | -<br>1672.1<br>08 | 9.62  | -<br>1672.1<br>06 | 9.43  | -36.44 | -35.02 |  |  |
| 1<br>5 | GA6       | GGAG  | 460.44 | 4.42(sa<br>fe) | -<br>1672.0<br>59 | 12.59 | -<br>1672.1<br>11 | 24.98 | -<br>1672.1<br>09 | 24.44 | -32.82 | -31.45 |  |  |
| 1<br>6 | GA7       | GGAA  | 402.40 | 4.31(sa<br>fe) | -<br>1444.4<br>50 | 6.66  | -<br>1444.4<br>94 | 10.51 | -<br>1444.4<br>92 | 10.31 | -27.34 | -26.37 |  |  |
| 1<br>7 | GA8       | GAGA  |        |                | -<br>1444.4<br>21 | 6.04  | -<br>1444.4<br>86 | 9.39  | -<br>1444.4<br>83 | 8.70  | -40.77 | -39.19 |  |  |
| 1<br>8 | GA9       | GAAG  |        |                | -<br>1444.4<br>29 | 15.96 | -<br>1444.4<br>92 | 22.31 | -<br>1444.4<br>90 | 22.04 | -40.04 | -38.54 |  |  |
| 1<br>9 | GA1<br>0  | GGGGA |        |                | -<br>2146.6<br>82 | 6.28  | -<br>2146.7<br>35 | 10.70 | -<br>2146.7<br>33 | 10.44 | -33.37 | -32.08 |  |  |
| 2<br>0 | GA1<br>1  | GGGAG | 589.56 | 4.51(sa<br>fe) | -<br>2146.6<br>57 | 14.84 | -<br>2146.7<br>41 | 24.30 | -<br>2146.7<br>38 | 23.72 | -52.65 | -50.54 |  |  |
| 2<br>1 | GA1<br>2  | GGAGG | 589.56 |                | -<br>2146.6<br>40 | 13.87 | -<br>2146.7<br>19 | 20.97 | -<br>2146.7<br>16 | 20.52 | -49.35 | -47.45 |  |  |

|        |          |             |        |                |              |       |              |       |              |       |        |                |  |  |
|--------|----------|-------------|--------|----------------|--------------|-------|--------------|-------|--------------|-------|--------|----------------|--|--|
| 2<br>2 | GA1<br>3 | GGAAG       | 531.52 | 4.47(sa<br>fe) | 1919.0<br>48 | 3.36  | 1919.1<br>18 | 7.81  | 1919.1<br>15 | 7.67  | -43.70 | -42.11         |  |  |
| 2<br>3 | GA1<br>4 | GAGAG       | 531.52 | 4.47(sa<br>fe) | 1919.0<br>42 | 9.71  | 1919.1<br>15 | 14.15 | 1919.1<br>13 | 14.01 | -45.95 | -44.23         |  |  |
| 2<br>4 | GA1<br>5 | GAAAG       | 473.48 | 4.41(sa<br>fe) | 1691.4<br>19 | 8.99  | R            |       |              |       | 0.00   | 1061365.5<br>3 |  |  |
| 2<br>5 | GA1<br>6 | GGGGG<br>A  | 718.67 | 4.64(sa<br>fe) | 2621.2<br>40 | 6.97  | 2621.3<br>33 | 9.69  | 2621.3<br>29 | 9.51  | -58.02 | -55.77         |  |  |
| 2<br>6 | GA1<br>7 | GGGAG<br>G  | 718.67 | 4.64(sa<br>fe) | 2595.3<br>39 | 3.25  | 2595.3<br>90 | 3.96  | 2595.3<br>91 | 4.75  | -32.07 | -32.39         |  |  |
| 2<br>7 | GA1<br>8 | GAGGA<br>G  | 660.63 | 4.54(sa<br>fe) | 2368.7<br>21 | 4.41  |              |       |              |       |        |                |  |  |
| 2<br>5 | D1       | D-G         | 247.29 |                | 823.08<br>3  | 1.92  | 823.10<br>8  | 2.83  | 823.10<br>7  | 2.79  | -15.87 | -15.30         |  |  |
| 2<br>6 | D2       | G-D-G       | 364.40 |                | 1260.8<br>46 | 2.45  | 1260.8<br>97 | 2.17  |              |       | -32.18 | 791180.93      |  |  |
| 2<br>7 | D3       | GG-D-G      | 479.49 |                | 1694.9<br>85 | 2.24  | 1695.0<br>49 | 3.88  | 1695.0<br>47 | 3.76  | -40.20 | -38.78         |  |  |
| 2<br>8 | D4       | GGDGG       | 594.57 |                | 2130.3<br>38 | 9.55  | 2130.4<br>17 | 12.93 | 2130.4<br>14 | 12.79 | -49.53 | -47.66         |  |  |
| 2<br>9 | D5       | GGGDG<br>G  | 709.66 | 4.73(sa<br>fe) | 2565.6<br>74 | 6.22  |              |       |              |       |        |                |  |  |
| 3<br>0 | D6       | GGGDG<br>GG | 824.75 | 4.86<br>(safe) | 3000.9<br>95 | 6.03  |              |       |              |       |        |                |  |  |
|        | D7       | GAGDG<br>AG | 764.79 | 4.75<br>safe   | 2702.9<br>11 | 17.27 | 2703.0<br>07 | 22.41 | 2703.0<br>03 | 21.76 | -60.18 | -57.85         |  |  |

|   |   |     |             |        |                |              |      |              |       |              |       |        |        |
|---|---|-----|-------------|--------|----------------|--------------|------|--------------|-------|--------------|-------|--------|--------|
| 3 | 1 | D18 | GAGDG<br>GA |        |                |              |      |              |       |              |       |        |        |
| 3 | 2 | D19 | GAGDG<br>A  | 610.62 | 4.82<br>(safe) | 2170.7<br>56 | 6.01 | 2170.8<br>31 | 9.13  |              |       | -46.65 |        |
| 3 | 3 | D20 | GAGDG<br>G  | 651.63 | 4.77(sa<br>fe) | 2338.1<br>14 | 6.42 | 2338.1<br>90 | 10.97 | 2338.1<br>87 | 10.79 | -47.43 | -45.63 |
| 3 | 4 | D21 | GADGG       | 536.54 | 4.77<br>(safe) | 1902.7<br>48 | 4.89 | 1902.8<br>16 | 8.21  | 1902.8<br>14 | 8.04  | -42.92 | -41.34 |
| 3 | 5 | D22 | GADGA       | 478.50 | 4.7(safe<br>)  | 1675.1<br>44 | 8.72 | 1675.2<br>13 | 10.89 | 1675.2<br>10 | 10.77 | -43.13 | -41.55 |
| 3 | 6 | D24 | ADG         | 306.36 | 4.1(safe<br>)  | 1032.0<br>56 | 5.99 | 1032.0<br>92 | 7.95  | 1032.0<br>91 | 7.82  | -22.68 | -21.96 |
| 3 | 7 | D25 | GADG        | 407.42 | 4.68<br>(safe) | 1428.1<br>45 | 5.41 | 1428.1<br>98 | 6.63  | 1428.1<br>96 | 6.57  | -33.08 | -31.89 |
| 3 | 8 | D26 | GGADG       | 537.52 | 4.74(sa<br>fe) | 1922.5<br>68 | 7.87 | 1922.6<br>44 | 11.92 | 1922.6<br>41 | 11.82 | -47.45 | -45.62 |

Table S3: HOMO LUMO energy difference with increase in size of monomer to polymer and in presence of cross linker

|    | HOMO<br>(eV) | LUMO<br>(eV) | Band gap (eV) | Chemical hardness<br>( $\eta$ ) | Chemical softness<br>( $\sigma$ ) | Electronegativity<br>( $\chi$ ) | Electrophilicity<br>( $\omega$ ) |
|----|--------------|--------------|---------------|---------------------------------|-----------------------------------|---------------------------------|----------------------------------|
| D1 | -6.097       | -1.079       | 5.018         | 2.509                           | 0.398565165                       | 3.588                           | 2.565513                         |
| D2 | -6.5         | -0.379       | 6.121         | 3.0605                          | 0.326743996                       | 3.4395                          | 1.932717                         |
| D3 | -6.53        | -0.414       | 6.116         | 3.058                           | 0.327011118                       | 3.472                           | 1.971024                         |
| D4 | -6.473       | -0.657       | 5.816         | 2.908                           | 0.343878955                       | 3.565                           | 2.185218                         |
| D5 |              |              | 0             | 0                               |                                   | 0                               |                                  |

|         |        |        |       |        |             |        |          |
|---------|--------|--------|-------|--------|-------------|--------|----------|
| D6      |        |        |       | 0      |             | 0      |          |
| D7      | -6.398 | -0.302 | 6.096 | 3.048  | 0.32808399  | 3.35   | 1.840961 |
| D18     |        |        | 0     | 0      | #DIV/0!     | 0      |          |
| D19     | -6.356 | -0.527 | 5.829 | 2.9145 | 0.343112026 | 3.4415 | 2.031896 |
| D20     | -6.473 | -0.46  | 6.013 | 3.0065 | 0.332612673 | 3.4665 | 1.99844  |
| D21     | -6.424 | -0.378 | 6.046 | 3.023  | 0.330797221 | 3.401  | 1.913133 |
| D22     | -6.428 | -0.357 | 6.071 | 3.0355 | 0.329435019 | 3.3925 | 1.895743 |
| D24     | -6.448 | -0.314 | 6.134 | 3.067  | 0.326051516 | 3.381  | 1.863574 |
| D25     | -6.496 | -0.567 | 5.929 | 2.9645 | 0.337325013 | 3.5315 | 2.103473 |
| D26     | -6.58  | -0.716 | 5.864 | 2.932  | 0.34106412  | 3.648  | 2.269424 |
| Glycine | -6.881 | 0.535  | 7.416 | 3.708  | 0.269687163 | 3.173  | 1.357596 |
| G1      | -7.143 | -1.137 | 6.006 | 3.003  | 0.333000333 | 4.14   | 2.853746 |
| G2      | -7.018 | -0.106 | 6.912 | 3.456  | 0.289351852 | 3.562  | 1.835626 |
| G3      | -6.919 | 0.017  | 6.936 | 3.468  | 0.288350634 | 3.451  | 1.717042 |
| G4      | -6.98  | -0.546 | 6.434 | 3.217  | 0.310848617 | 3.763  | 2.200834 |
| G5      | -6.988 | -0.418 | 6.57  | 3.285  | 0.304414003 | 3.703  | 2.087094 |
| G6      | -6.867 | -0.48  | 6.387 | 3.1935 | 0.313136058 | 3.6735 | 2.112823 |
| GA1     | -6.881 | 0.074  | 6.955 | 3.4775 | 0.287562904 | 3.4035 | 1.665537 |
| GA2     | -6.888 | -0.148 | 6.74  | 3.37   | 0.296735905 | 3.518  | 1.83625  |
| GA3     | -7.018 | -0.031 | 6.987 | 3.4935 | 0.286245885 | 3.5245 | 1.777888 |
| GA4     | -6.829 | -0.219 | 6.61  | 3.305  | 0.302571861 | 3.524  | 1.878756 |
| GA4.1   | -6.793 | -0.042 | 6.751 | 3.3755 | 0.296252407 | 3.4175 | 1.730011 |
| GA5     | -6.92  | -0.543 | 6.377 | 3.1885 | 0.313627097 | 3.7315 | 2.183486 |
| GA6     | -6.966 | -0.228 | 6.738 | 3.369  | 0.296823983 | 3.597  | 1.920215 |
| GA7     | -6.766 | -0.196 | 6.57  | 3.285  | 0.304414003 | 3.481  | 1.844347 |
| GA8     | -6.783 | 0.013  | 6.796 | 3.398  | 0.294290759 | 3.385  | 1.686025 |
| GA9     | -6.883 | -0.016 | 6.867 | 3.4335 | 0.291247998 | 3.4495 | 1.732787 |
| GA10    | -6.89  | -0.414 | 6.476 | 3.238  | 0.308832613 | 3.652  | 2.059466 |
| GA11    | -6.949 | -0.115 | 6.834 | 3.417  | 0.292654375 | 3.532  | 1.825435 |

|      |        |        |       |        |             |        |          |
|------|--------|--------|-------|--------|-------------|--------|----------|
| GA12 | -6.881 | -0.56  | 6.321 | 3.1605 | 0.316405632 | 3.7205 | 2.189862 |
| GA13 | -6.787 | -0.098 | 6.689 | 3.3445 | 0.298998356 | 3.4425 | 1.771686 |
| GA14 | -6.74  | 0.002  | 6.742 | 3.371  | 0.296647879 | 3.369  | 1.683501 |
| GA15 | -6.738 | 0.048  | 6.786 | 3.393  | 0.294724433 | 3.345  | 1.64884  |
| GA16 | -6.712 | -0.592 | 6.12  | 3.06   | 0.326797386 | 3.652  | 2.179265 |
| GA17 | -7.475 | -3.996 | 3.479 | 1.7395 | 0.574877838 | 5.7355 | 9.455579 |

Table S4: protein ligand interaction with heparanase PDBID-7PRT

| S.No.               | Ligands                            | Lowest binding energy (kcal mol <sup>-1</sup> ) | Estimated inhibition constant (Ki) | H bond                                                         | Interacting Residue (non hydrogen bond)                                |
|---------------------|------------------------------------|-------------------------------------------------|------------------------------------|----------------------------------------------------------------|------------------------------------------------------------------------|
| Reference Molecules |                                    |                                                 |                                    |                                                                |                                                                        |
| 1                   | <i>Cyclophellitol</i>              | -4.65                                           | 829.53 uM                          | SER422 (2.036,1.901),<br>GLN424(1.828),<br>ARG465(2.135,1.928) |                                                                        |
| 2                   | <i>Roneparstat</i>                 | -1.36                                           | 100.76mM                           | ASP183(2.204),<br>ARG382(1.989)                                | ILE185,PHE385.LEU408,TYR<br>404,SER407,TRP365,LYS411,<br>LEU398,LEU182 |
| <i>Ligands</i>      |                                    |                                                 |                                    |                                                                |                                                                        |
| 1                   | <i>Glycine</i>                     | -4.09                                           | 1.00 mM                            | <b>H(1)</b> Lys232(1.79),                                      | GLU225, Ser228                                                         |
| 2                   | G1<br><i>N-Acryloylglycine (G)</i> | -5.16                                           | 166.36uM                           | <b>H(3)</b> LYS538(1.851),<br>LYS473(1.849,1.699)              | PRO469,ALA537                                                          |
| 3                   | G2<br><i>GG</i>                    | -4.53                                           | 479.91 uM                          | <b>H(3)</b> LYS280(1.916),<br>LYS284(1.725),<br>LYS277(1.812)  |                                                                        |

|    |       |               |       |          |                                                                                                               |                                               |
|----|-------|---------------|-------|----------|---------------------------------------------------------------------------------------------------------------|-----------------------------------------------|
| 4  | G3    | <i>GGG</i>    | -4.52 | 487.79uM | H(6) LYS232(1.703),<br><b>ARG272</b> (1.915),<br>THR275(2.129,1.828,1.946),<br>LYS274(2.236)                  | ASN227,GLN276,ARG273                          |
| 5  | G4    | <i>GGGG</i>   | -5.46 | 99.29 uM | H (7)<br>LYS277(2.073),LYS284(1.8<br>65),ARG273(2.059,1.852,1.8<br>19), <b>LYS280</b> (2.054)                 |                                               |
| 6  | G5    | <i>GGGGG</i>  | -7.76 | 2.05uM   | LYS325(2.169,2.134,1.836),<br><b>ARG272</b> (2.063),<br><b>LYS280</b> (1.928,1.926),<br><b>ARG273</b> (2.207) | ALA276                                        |
| 7  | G6    | <i>GGGGGG</i> | -7.62 | 2.62 uM  | AG273(2.159,2.094,1.895),<br>LYS325(2.22),<br><b>LYS280</b> (2.079,1.995),<br>LYS284(1.996),<br>LYS277(1.863) |                                               |
| 8  | GA1   | <i>G-A</i>    | -4.73 | 339.9uM  | <b>H (4)</b> VAL433(2.183,1.925),<br>VAL423(2.019),<br>ARG374(2.215)                                          | MET420,ALA421,SER422,LE<br>U371,TYR434,LEU431 |
| 9  | GA4.1 | <i>A-A-G</i>  | -5.18 | 159.74uM | <b>H(4)</b> ARG465(2.208, 2.121,<br>2.063, 2.002),<br><b>GLN424</b> (2.003)                                   | LEU452,LEU466,PRO467                          |
| 10 | GA2   | <i>G-G-A</i>  | -5.57 | 81.94 uM | MET512(2.114),<br>ASN496(2.149),<br>LYS514(1.858,1.791)                                                       | LEU498,LEU495                                 |
| 11 | GA3   | <i>A-G-G</i>  |       |          |                                                                                                               |                                               |

|    |     |                |       |           |                                                                                     |                                                  |
|----|-----|----------------|-------|-----------|-------------------------------------------------------------------------------------|--------------------------------------------------|
| 12 | GA4 | <i>G-A-G</i>   | -4.4  | 597.59uM  | LYS411(1.885),VAL380(2.086),ARH382(2.115,1.747),PHE385(1.889),PHE386(2.042)         | VAL384                                           |
| 13 | GA5 | <i>G-G-G-A</i> | -5.05 | 199.39uM  | SER422(2.007,1.693),GLN424(2.235,2.013)                                             | LEU452,LEU464,ARG465,VAL433,VAL423               |
| 14 | GA6 | <i>G-G-A-G</i> | -5.11 | 178.43 uM | SER422(2.206),ARG465(2.001,1.693),GLN424(2.19,1.825)                                | VAL423,LEU466,LEU452,PRO467,LEU450,PHE470,ILE534 |
| 15 | GA7 | <i>G-G-A-A</i> |       | 689.02uM  | <b>LYS280</b> (1.977,1.952),LYS325(2.153),GLN328(1.971),VAL329,ALA276,ARG273,SER332 | HIS458,PHE527                                    |
| 16 | GA8 | <i>G-A-G-A</i> | -4.56 | 451.4uM   | LYS412(1.78),VAL380(1.752),LYS411(2.0,1.861,2.14)                                   | VAL414,PHE410,ASN439,VAL379                      |
| 17 | GA9 | <i>G-A-A-G</i> | -5.37 | 116.15uM  | GLN424(2.062),GLY425(2.144),ARG465(2.092,2.08,2.024)                                | SER422,VAL423,LE464,LEU466,TYR463                |



|    |      |        |       |           |                                                                                    |                                                         |
|----|------|--------|-------|-----------|------------------------------------------------------------------------------------|---------------------------------------------------------|
| 18 | GA10 | GGGGA  | -6    | 39.88 uM  | LYS352(2.215),LYS284(1.869), <b>LYS280(2.082,1.759)</b> ,GLN328(2.145)             | VAL329,LYS277,ARG283,LYS325,ALA276                      |
| 19 | GA11 | GGGAG  | -4.52 | 489.68 uM | ARG481(2.127),LYS514(1.79),THR461(2.04,2.0),ALA526(1.966),LYS477(2.115)            | PRO525,LEU479,ASN496                                    |
| 20 | GA12 | GGAGG  | -5.93 | 44.91uM   | ARG273(2.134,1.811),LYS277(1.87,1.682),LYS280(1.983),LYS284(1.866)                 | LYS274                                                  |
| 21 | GA13 | GGAAG  | -6.26 | 25.68uM   | ARG465(2.079,1.89,1.877),TYR463(2.199),SER422(2.093),LYS462(2.029)                 | LEU464,PRO467,GLN424,ALA421,VAL423                      |
| 22 | GA14 | GAGAG  | -6.96 | 7.88 uM   | GLN328(1.891),LYS325(1.91),LYS284(1.892), <b>LYS280(2.053)</b> ,ARG273(2.149)      | PRO271,VAL329,ALA276,LYS277                             |
| 23 | GA15 | GAAAG  | -6.7  | 12.19uM   | ARG465(2.028,2.004,1.93), <b>SER422(2.149,1.992)</b> ,GLN424(2.129)                | VAL423,VAL433,MET420,PRO467,LEU452,LEU466,LEU435,ALA421 |
| 24 | GA16 | GGGGGA | -3.31 | 3.75mM    | ARG273, ARG 273, <b>LYS 280</b>                                                    |                                                         |
| 25 | GA17 | GGGAGG | -6.46 | 18.25uM   | ARG273(2.218,1.929,1.873), <b>LYS280(1.766)</b> ,LYS284(1.918),LYS277(1.975,1.844) | SER281                                                  |

|    |           |         |        |           |                                                                                                    |                                                |
|----|-----------|---------|--------|-----------|----------------------------------------------------------------------------------------------------|------------------------------------------------|
| 26 | <i>D1</i> | D-G     | -6.83  | 9.8 uM    | GLN424(2.131),ARG465(2.074,1.982)                                                                  | LEU464,LEU452                                  |
| 27 | <i>D2</i> | G-D-G   | -7.59  | 274.09 nM | Lys 280 ( ) Lys 325                                                                                | ARG273, PRO271, LYS325, ARG272, Lys284, ALA276 |
| 28 | <i>D3</i> | GG-D-G  | -9.04  | 235nM     | LYS274(2.199,1.826),LYS231(2.107,1.957), <b>ARG272</b> (1.802),LYS277(1.849)                       | SER228,LEU230,PHE236,ASN227,ARG273             |
| 29 | <i>D4</i> | GGDGG   | -11.08 | 7.53 nM   | <b>LYS231(2.217,2.083),LYS232</b> (1.913),LEU230(2.076), <b>ARG272</b> (1.946,1.939),LYS274(1.758) | VAL329, ALA276, PRO271,ARG272                  |
| 30 | <i>D5</i> | GGGDGG  | -10.72 | 13.87nm   | <b>ARG272</b> (2.063),ARG273(2.207),LYS325(2.169,2.134,1.836), lys277, lys280' lys280              | SER332,VAL329, PRO271,                         |
| 31 | <i>D6</i> | GGGDGGG | -8.39  | 705.85 nM | <b>LYS231</b> (1.798,1.763),ASN227(1.826),LYS274(1.941,1.799), <b>ARG272</b> (2.182,1.973)         | ARG273,SER228,LEU230                           |
| 32 | <i>D7</i> | GAGDGAG | -5.67  | 69.31µM   | <b>ARG273</b> (2.063,1.724), <b>LYS325</b> (1.882), <b>LYS280</b> (1.981), <b>GLN328</b> (2.229)   | VAL329,ALA276,ARG272,PRO271                    |

|    |            |         |       |               |                                                                                              |                                                  |
|----|------------|---------|-------|---------------|----------------------------------------------------------------------------------------------|--------------------------------------------------|
| 33 | <i>D18</i> | GAGDGGA | -7.66 | 2.43 $\mu$ M  | <b>ARG273</b> (1.895), <b>LYS325</b> (2.058), <b>LYS280</b> (2.224, 2.18),<br>LYS277 (2.175) | SER332, GLN 328, PRO271                          |
| 34 | <i>D20</i> | GAGDGG  | -7.6  | 2.7 $\mu$ M   | LYS277(2.122),<br><b>LYS280</b> (2.045, 2.232), LYS<br>325 (2.17)                            | GLN328, PRO 271                                  |
| 35 | <i>D21</i> | GADGG   | -8.22 | 940.4 nM      | LYS277(1.916),LYS325(1.979),LYS284(2.177),PRO271<br>(2.132), <b>LYS280</b> (1.933)           | SER281,SER332,VAL329,ALA276, <b>ARG273</b>       |
| 36 | <i>D22</i> | GADGA   | -6.68 | 12.66 $\mu$ M | ARG374(2.182,2.031,1.919),<br>ALA421(2.175),VAL433(1.9421.839)                               | MET420,MET375,ALA421,VAL433,LEU371,ARG432,LEU431 |
| 37 | <i>D24</i> | ADG     | -5.8  | 55.81 $\mu$ M | SER422, TYR463                                                                               | ALA421, VAL423, TYR463,<br>LYS462, PRO467        |
| 38 | <i>D25</i> | GADG    | -6.68 | 12.7 $\mu$ M  | GLN424(1.951), <b>SER422</b> (2.127),ARG465(1.909,1.631)                                     | ALA421,VAL423,VAL433,LEU452,LEU466,PRO467        |
